# Supplementary material for: Sociodemographic, Lifestyle, Physical, and Psychosocial Determinants of Cognitive Reserve
Source: PubMed Central journal article supplement — J Alzheimers Dis. 2022 Jan 18;85(2):701–13. doi: 10.3233/JAD-215122 (PMC8842775; doi:10.3233/jad-215122), 2022-01-18
Supplement: jad-85-jad215122-s001.pdf [file jad-85-jad215122-s001.pdf]

# Supplementary Material

## Sociodemographic, Lifestyle, Physical, and Psychosocial Determinants of Cognitive Reserve

Supplementary Figure 1. Flow diagram of the inclusion process

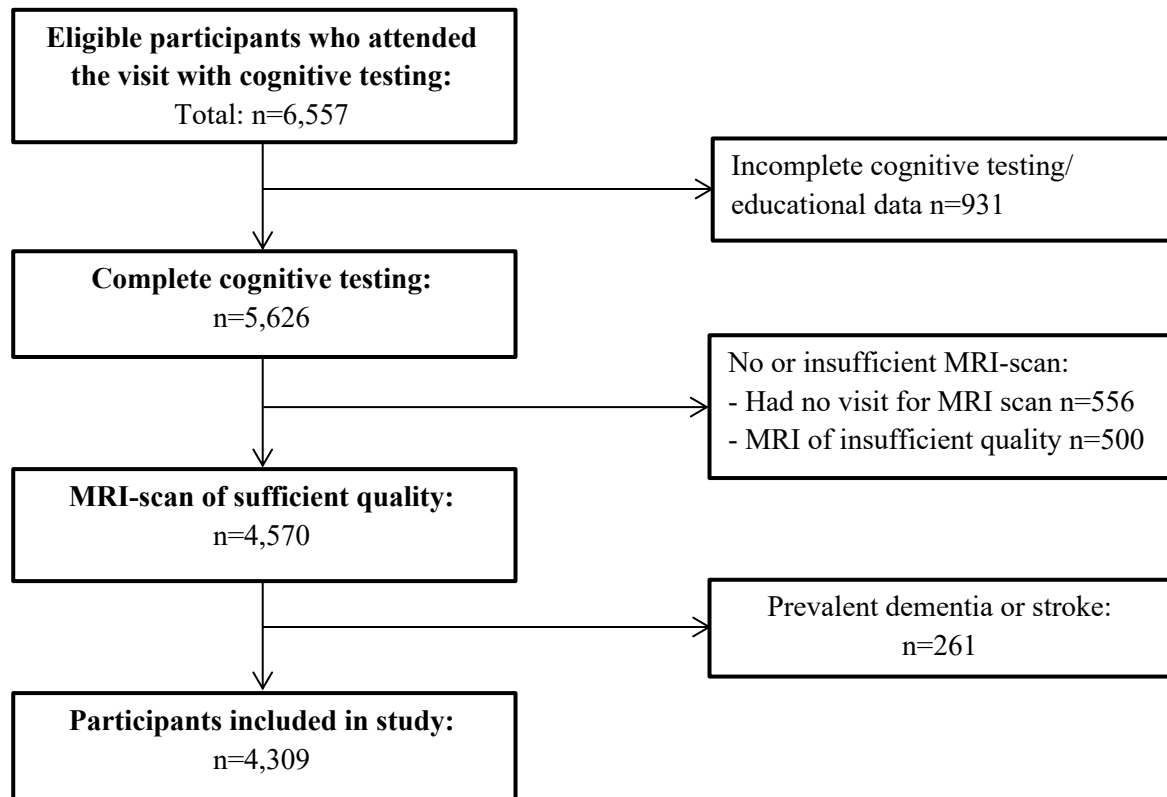

**Supplementary Table 1.** Associations of demographic, lifestyle, physical health, and psychosocial determinants with cognitive reserve, stratified for *APOE* ε4 carriership (n=4,011; non-carrier n=2,866, carrier n=1,145)

| <b>Domain and characteristic</b>                                            | <b>Model: Carrier</b><br>Mean dif. (95%CI) | <b>Model: Non-carrier</b><br>Mean dif. (95%CI) | <b>p-product term</b> |
|-----------------------------------------------------------------------------|--------------------------------------------|------------------------------------------------|-----------------------|
| <i>Demographics</i>                                                         |                                            |                                                |                       |
| Marital status                                                              |                                            |                                                |                       |
| - Married/living together                                                   | Ref                                        | Ref                                            |                       |
| - Widowed or divorced                                                       | -0.45 (-0.81; -0.08)                       | 0.11 (-0.12; 0.34)                             |                       |
| - Never married                                                             | <b>-0.67 (-1.12; -0.21)</b>                | -0.04 (-0.35; 0.27)                            | 0.389                 |
| Living alone                                                                | 0.31 (-0.06; 0.69)                         | -0.18 (-0.41; 0.07)                            |                       |
| Paid employment status                                                      |                                            |                                                |                       |
| - Employed                                                                  | Ref                                        | Ref                                            |                       |
| - Retired                                                                   | 0.20 (-0.06; 0.47)                         | 0.05 (-0.11; 0.22)                             |                       |
| - No paid employment                                                        | -0.21 (-0.46; 0.03)                        | -0.14 (-0.30; 0.02)                            |                       |
| <i>Lifestyle</i>                                                            |                                            |                                                |                       |
| BMI, per SD                                                                 | 0.02 (-0.06; 0.10)                         | -0.06 (-0.11; -0.01)                           |                       |
| Smoking                                                                     |                                            |                                                |                       |
| - Never                                                                     | Ref                                        | Ref                                            |                       |
| - Former                                                                    | 0.07 (-0.11; 0.25)                         | 0.07 (-0.03; 0.18)                             |                       |
| - Current                                                                   | <b>-0.36 (-0.60; -0.13)</b>                | <b>-0.28 (-0.43; -0.14)</b>                    | 0.822                 |
| Alcohol, per SD                                                             | <b>0.12 (0.04; 0.20)</b>                   | 0.04 (-0.01; 0.10)                             | 0.208                 |
| Diet Quality Score, per SD                                                  | 0.07 (-0.02; 0.15)                         | -0.02 (-0.08; 0.03)                            |                       |
| Physical activity, per SD                                                   | -0.05 (-0.14; 0.03)                        | 0.00 (-0.05; 0.05)                             |                       |
| <i>Physical health</i>                                                      |                                            |                                                |                       |
| Hypertension                                                                | -0.08 (-0.26; 0.09)                        | 0.00 (-0.11; 0.11)                             |                       |
| Diabetes mellitus                                                           | -0.33 (-0.65; -0.01)                       | -0.22 (-0.40; -0.05)                           |                       |
| Cardiovascular disease                                                      | -0.20 (-0.56; 0.16)                        | 0.03 (-0.18; 0.24)                             |                       |
| Cancer                                                                      | -0.21 (-0.72; 0.30)                        | -0.22 (-0.45; 0.01)                            |                       |
| COPD                                                                        | -0.00 (-0.24; 0.23)                        | -0.19 (-0.35; -0.03)                           |                       |
| <i>Psychosocial health</i>                                                  |                                            |                                                |                       |
| Depressive symptoms, per SD                                                 | -0.04 (-0.12; 0.04)                        | -0.08 (-0.14; -0.02)                           |                       |
| Sleep quality, per SD                                                       | -0.03 (-0.12; 0.05)                        | -0.02 (-0.07; 0.03)                            |                       |
| Quality of life, per SD                                                     | 0.05 (-0.05; 0.14)                         | 0.02 (-0.03; 0.07)                             |                       |
| Models are adjusted for all variables                                       |                                            |                                                |                       |
| <b>Estimates in bold</b> =significant after false discovery rate adjustment |                                            |                                                |                       |
| p, p-value for the product term tested in the not-stratified model, *p<0.05 |                                            |                                                |                       |
